# Supplementary material for: An application of the Shapley value to the analysis of co-expression networks
Source: Springer Nature journal article supplement (doi:10.1007/s41109-018-0095-y), 2018-08-24
Supplement: MOESM1 [file 16072620]

## S1 Table

| Gene symbol              | Gene name                                              | $\rho$           |
|--------------------------|--------------------------------------------------------|------------------|
| ZNF771 <sup>1,2,3</sup>  | zinc finger protein 771                                | 11.9992275312791 |
| ATP2B2 <sup>1,2,3</sup>  | ATPase plasma membrane Ca <sup>2+</sup> transporting 2 | 11.2142270966438 |
| CDHR5 <sup>1,2,3</sup>   | cadherin related family member 5                       | 9.1885254409648  |
| WNT10B <sup>2,3</sup>    | Wnt family member 10B                                  | 8.13030213112638 |
| PRB1 <sup>1,2,3</sup>    | proline rich protein BstNI subfamily 1                 | 8.00968140817491 |
| SEZ6L <sup>2,3</sup>     | seizure related 6 homolog like                         | 7.91259620038736 |
| C1orf105 <sup>1,3</sup>  | chromosome 1 open reading frame 105                    | 7.3200847410164  |
| HOXC8 <sup>1,2,3</sup>   | homeobox C8                                            | 7.23088256293767 |
| TSPY1 <sup>1,2,3</sup>   | testis specific protein, Y-linked 1                    | 6.83961493570101 |
| EMX1 <sup>2,3</sup>      | empty spiracles homeobox 1                             | 6.82705292482686 |
| EDA <sup>1,2,3</sup>     | ectodysplasin A                                        | 6.79840320069657 |
| TCL6 <sup>1,2,3</sup>    | T-cell leukemia/lymphoma 6 (non-protein coding)        | 6.20557451207543 |
| CCL25 <sup>1,2,3</sup>   | C-C motif chemokine ligand 25                          | 6.16485389207215 |
| MRPL3 <sup>3</sup>       | mitochondrial ribosomal protein L3                     | 6.14618678301022 |
| ZNF335 <sup>3</sup>      | zinc finger protein 335                                | 5.99469477265226 |
| GRIN1 <sup>2,3</sup>     | glutamate ionotropic receptor NMDA type subunit 1      | 5.86845584630501 |
| PAX8 <sup>1,2,3</sup>    | paired box 8                                           | 5.70669682587376 |
| FOXL1 <sup>2,3</sup>     | forkhead box L1                                        | 5.58403737718699 |
| PDIA2 <sup>3</sup>       | protein disulfide isomerase family A member 2          | 5.53122000122485 |
| AK024615 <sup>1,3</sup>  | NA                                                     | 5.50876181959234 |
| GYP A <sup>1,2,3</sup>   | glycophorin A (MNS blood group)                        | 5.22594690710353 |
| NME1 <sup>3</sup>        | NME/NM23 nucleoside diphosphate kinase 1               | 5.08064008570667 |
| CDK1 <sup>1,3</sup>      | cyclin dependent kinase 1                              | 4.91327186640558 |
| D16471 <sup>3</sup>      | NA                                                     | 4.83935622133443 |
| CCT3 <sup>3</sup>        | chaperonin containing TCP1 subunit 3                   | 4.6954499389479  |
| KCNB2 <sup>1,2,3</sup>   | potassium voltage-gated channel subfamily B member 2   | 4.69272227270457 |
| PRB4 <sup>1,2,3</sup>    | proline rich protein BstNI subfamily 4                 | 4.60403627742111 |
| TCF21 <sup>1,3,4</sup>   | transcription factor 21                                | 4.60089382572832 |
| BMP8B <sup>1,2,3</sup>   | bone morphogenetic protein 8b                          | 4.59970896117806 |
| FHL1 <sup>1,4</sup>      | four and a half LIM domains 1                          | 4.52930361513385 |
| LDB2 <sup>1,3,4</sup>    | LIM domain binding 2                                   | 4.51187237653154 |
| EDNRB <sup>1,4</sup>     | endothelin receptor type B                             | 4.47714205047538 |
| FAM107A <sup>1,3,4</sup> | family with sequence similarity 107 member A           | 4.34816411415173 |
| TEK <sup>1,3,4</sup>     | TEK receptor tyrosine kinase                           | 4.11666304132315 |
| MAP3K19 <sup>2,3</sup>   | mitogen-activated protein kinase kinase kinase 19      | 3.97408038386278 |
| CDC20                    | cell division cycle 20                                 | 3.93354962423571 |
| LLGL1 <sup>2,3</sup>     | LLGL1, scribble cell polarity complex component        | 3.89338477336018 |
| JAM2 <sup>1,4</sup>      | junctional adhesion molecule 2                         | 3.83394418115792 |
| GRK5 <sup>4</sup>        | G protein-coupled receptor kinase 5                    | 3.79630010066131 |
| AK025422 <sup>1,3</sup>  | NA                                                     | 3.7846980734651  |
| CA4 <sup>1,4</sup>       | carbonic anhydrase 4                                   | 3.77498362077175 |

|                         |                                                                                       |                  |
|-------------------------|---------------------------------------------------------------------------------------|------------------|
| HAPLN <sup>2,3</sup>    | hyaluronan and proteoglycan link protein 2                                            | 3.74556662369419 |
| FLJ11292 <sup>2,3</sup> | NA                                                                                    | 3.7060244652241  |
| AK022038 <sup>2,3</sup> | NA                                                                                    | 3.67100666739232 |
| HMX1 <sup>3</sup>       | H6 family homeobox 1                                                                  | 3.64186374038613 |
| ARVCF <sup>3</sup>      | armadillo repeat gene deleted in velocardiofacial syndrome                            | 3.5586929254162  |
| CKS1B                   | CDC28 protein kinase regulatory subunit 1B                                            | 3.54580594585801 |
| CD93 <sup>1,4</sup>     | CD93 molecule                                                                         | 3.51587786313662 |
| FIGF <sup>1,4</sup>     | vascular endothelial growth factor D                                                  | 3.50044064981034 |
| ADAM5                   | ADAM metallopeptidase domain 5 (pseudogene)                                           | 3.49240648489671 |
| KPNA2 <sup>3</sup>      | karyopherin subunit alpha 2                                                           | 3.48841969287436 |
| TOP2A <sup>3</sup>      | topoisomerase (DNA) II alpha                                                          | 3.47668462623347 |
| AK025072 <sup>3</sup>   | NA                                                                                    | 3.46433746454934 |
| SASH1 <sup>1,4</sup>    | SAM and SH3 domain containing 1                                                       | 3.44723545921552 |
| KIR2DS3 <sup>2,3</sup>  | killer cell immunoglobulin like receptor, two Ig domains and short cytoplasmic tail 3 | 3.44338855236704 |
| AOC3 <sup>1,3,4</sup>   | amine oxidase, copper containing 3                                                    | 3.4212214776578  |
| FXVD6 <sup>1,4</sup>    | FXVD domain containing ion transport regulator 6                                      | 3.41401394751061 |
| BTNL8                   | butyrophilin like 8                                                                   | 3.41298981322471 |
| RAMP2 <sup>1,4</sup>    | receptor activity modifying protein 2                                                 | 3.40102612306597 |
| AGER <sup>1,4</sup>     | advanced glycosylation end product-specific receptor                                  | 3.38854823247169 |
| HTR3B <sup>2,3</sup>    | 5-hydroxytryptamine receptor 3B                                                       | 3.38731134451332 |
| KIR2DS1 <sup>2,3</sup>  | killer cell immunoglobulin like receptor, two Ig domains and short cytoplasmic tail 1 | 3.38492496733694 |
| CD53                    | CD53 molecule                                                                         | 3.37511461457082 |
| CLEC3B <sup>1,3,4</sup> | C-type lectin domain family 3 member B                                                | 3.36879474738695 |
| DLGAP5                  | DLG associated protein 5                                                              | 3.36645806294723 |
| STARD13 <sup>1,4</sup>  | StAR related lipid transfer domain containing 13                                      | 3.35970120523624 |
| OR1A1                   | olfactory receptor family 1 subfamily A member 1                                      | 3.35835999448623 |
| RAX <sup>2,3</sup>      | retina and anterior neural fold homeobox                                              | 3.34890361540423 |
| LIMS2 <sup>1,4</sup>    | LIM zinc finger domain containing 2                                                   | 3.33945435405761 |
| MIF                     | macrophage migration inhibitory factor (glycosylation-inhibiting factor)              | 3.30746031746032 |
| CHRM2                   | cholinergic receptor muscarinic 2                                                     | 3.28992041717679 |
| AW975117                | NA                                                                                    | 3.27085349169641 |
| PECAM1 <sup>1,4</sup>   | platelet and endothelial cell adhesion molecule 1                                     | 3.27036184818285 |
| NODAL <sup>3</sup>      | nodal growth differentiation factor                                                   | 3.26050389651186 |
| FOXF1 <sup>1,4</sup>    | forkhead box F1                                                                       | 3.26006295780186 |
| HRG <sup>1,2,3</sup>    | histidine rich glycoprotein                                                           | 3.25133676965899 |
| CAMK1G <sup>2,3</sup>   | calcium/calmodulin dependent protein kinase IG                                        | 3.24179862903933 |
| KCNJ1                   | potassium voltage-gated channel subfamily J member 1                                  | 3.23365890625387 |
| VSIG4 <sup>3</sup>      | V-set and immunoglobulin domain containing 4                                          | 3.18251984492977 |
| SMCP <sup>2,3</sup>     | sperm mitochondria associated cysteine rich protein                                   | 3.17712705414093 |
| AF119878 <sup>2</sup>   | NA                                                                                    | 3.17415257308162 |
| ILF2                    | interleukin enhancer binding factor 2                                                 | 3.16155261732781 |

|                         |                                                                                                   |                  |
|-------------------------|---------------------------------------------------------------------------------------------------|------------------|
| MAD2L1                  | MAD2 mitotic arrest deficient-like 1 (yeast)                                                      | 3.15320581892578 |
| DLX2 <sup>2,3</sup>     | distal-less homeobox 2                                                                            | 3.07425506253775 |
| FUT7 <sup>3</sup>       | fucosyltransferase 7                                                                              | 3.07120067035173 |
| MARCO <sup>3</sup>      | macrophage receptor with collagenous structure                                                    | 3.05487810062594 |
| RAI2 <sup>1,4</sup>     | retinoic acid induced 2                                                                           | 3.05452583812376 |
| AK022363 <sup>2,3</sup> | NA                                                                                                | 3.05450798012059 |
| MFAP4 <sup>1,3</sup>    | microfibrillar associated protein 4                                                               | 3.04897947000773 |
| GHRHR <sup>3</sup>      | growth hormone releasing hormone receptor                                                         | 3.00490573526143 |
| ACADL <sup>1,4</sup>    | acyl-CoA dehydrogenase, long chain                                                                | 2.99154511559473 |
| AL162040                | NA                                                                                                | 2.99086383959853 |
| SLC22A11 <sup>2,3</sup> | solute carrier family 22 member 11                                                                | 2.979451941982   |
| DUX4L2                  | double homeobox 4 like 2                                                                          | 2.97916410135979 |
| SERPINB10 <sup>2</sup>  | serpin family B member 10                                                                         | 2.96320258039237 |
| GRM1 <sup>2,3</sup>     | glutamate metabotropic receptor 1                                                                 | 2.9593734805239  |
| ABCA8 <sup>1,4</sup>    | ATP binding cassette subfamily A member 8                                                         | 2.95599380651336 |
| S1PR1 <sup>1,4</sup>    | sphingosine-1-phosphate receptor 1                                                                | 2.92469788005853 |
| SNRPG <sup>3</sup>      | small nuclear ribonucleoprotein polypeptide G                                                     | 2.9132885460193  |
| KCNA2                   | potassium voltage-gated channel subfamily A member 2                                              | 2.9121553250216  |
| TGFBR3 <sup>1,4</sup>   | transforming growth factor beta receptor 3                                                        | 2.90053579900917 |
| OPRM1 <sup>2,3</sup>    | opioid receptor mu 1                                                                              | 2.89181056116898 |
| ATP2B3 <sup>2,3</sup>   | ATPase plasma membrane Ca <sup>2+</sup> transporting 3                                            | 2.87401927974233 |
| PART1                   | prostate androgen-regulated transcript 1 (non-protein coding)                                     | 2.85975828610126 |
| PAICS                   | phosphoribosylaminoimidazole carboxylase; phosphoribosylaminoimidazolesuccinocarboxamide synthase | 2.82590246660617 |
| SNRPE                   | small nuclear ribonucleoprotein polypeptide E                                                     | 2.82412666489096 |
| RFC4                    | replication factor C subunit 4                                                                    | 2.79219066632501 |
| GPM6A <sup>1,4</sup>    | glycoprotein M6A                                                                                  | 2.78089283215017 |
