# Supplementary material for: An application of the Shapley value to the analysis of co-expression networks
Source: Springer Nature journal article supplement (doi:10.1007/s41109-018-0095-y), 2018-08-24
Supplement: MOESM2 [file 16072620]

## S2 Table

| Input                   | Approved name                                                 | Shapley.value.2.  | k |
|-------------------------|---------------------------------------------------------------|-------------------|---|
| MRPL42                  | mitochondrial ribosomal protein L42                           | 0.5               | 0 |
| NRAS                    | neuroblastoma RAS viral oncogene homolog                      | 0.5               | 1 |
| PDIA4                   | protein disulfide isomerase family A member 4                 | 0.5               | 1 |
| PRDX4                   | peroxiredoxin 4                                               | 0.5               | 0 |
| DACH1                   | dachshund family transcription factor 1                       | 0.404807256235828 | 1 |
| RUNX1T1                 | RUNX1 translocation partner 1                                 | 0.388888888888889 | 1 |
| SEMA6A                  | semaphorin 6A                                                 | 0.388888888888889 | 0 |
| ATP2B2 <sup>1,2,3</sup> | ATPase plasma membrane Ca <sup>2+</sup> transporting 2        | 0.379710975299211 | 0 |
| AK024553                | NA                                                            | 0.361204481792717 | 0 |
| CDH10                   | cadherin 10                                                   | 0.333333333333333 | 1 |
| GC                      | GC, vitamin D binding protein                                 | 0.333333333333333 | 0 |
| HLA-A                   | major histocompatibility complex, class I, A                  | 0.333333333333333 | 1 |
| HLA-C                   | major histocompatibility complex, class I, C                  | 0.333333333333333 | 0 |
| HLA-F                   | major histocompatibility complex, class I, F                  | 0.333333333333333 | 0 |
| SCGN                    | secretagogin, EF-hand calcium binding protein                 | 0.333333333333333 | 0 |
| DLX2 <sup>2,3</sup>     | distal-less homeobox 2                                        | 0.290909090909091 | 0 |
| PRB1 <sup>1,2,3</sup>   | proline rich protein BstNI subfamily 1                        | 0.270887445887446 | 0 |
| GYPA <sup>1,2,3</sup>   | glycophorin A (MNS blood group)                               | 0.263044308632544 | 0 |
| KCNJ1                   | potassium voltage-gated channel subfamily J member 1          | 0.236853832442068 | 0 |
| STARD13 <sup>1,4</sup>  | StAR related lipid transfer domain containing 13              | 0.214331065759637 | 0 |
| CA1 <sup>3</sup>        | carbonic anhydrase 1                                          | 0.20952380952381  | 0 |
| CDHR5 <sup>1,2,3</sup>  | cadherin related family member 5                              | 0.2               | 0 |
| GPATCH4                 | G-patch domain containing 4                                   | 0.2               | 0 |
| GRM8                    | glutamate metabotropic receptor 8                             | 0.2               | 1 |
| SEZ6L <sup>1,2,3</sup>  | seizure related 6 homolog like                                | 0.2               | 0 |
| DSCAM <sup>1,2</sup>    | DS cell adhesion molecule                                     | 0.199458874458874 | 0 |
| KCNS1 <sup>2</sup>      | potassium voltage-gated channel modifier subfamily S member 1 | 0.178030303030303 | 0 |
| OR1A1                   | olfactory receptor family 1 subfamily A member 1              | 0.170887445887446 | 0 |
| SLC12A5                 | solute carrier family 12 member 5                             | 0.170887445887446 | 0 |
| C9orf116                | chromosome 9 open reading frame 116                           | 0.166666666666667 | 0 |
| CFAP45                  | cilia and flagella associated protein 45                      | 0.166666666666667 | 0 |
| DNAI1                   | dynein axonemal intermediate chain 1                          | 0.166666666666667 | 0 |
| TEKT2                   | tektin 2                                                      | 0.166666666666667 | 0 |
| ZBBX                    | zinc finger B-box domain containing                           | 0.166666666666667 | 0 |
| ZMYND10                 | zinc finger MYND-type containing 10                           | 0.166666666666667 | 1 |
| AW975117                | NA                                                            | 0.15952380952381  | 0 |
| HRG <sup>1,2,3</sup>    | histidine rich glycoprotein                                   | 0.158282403870639 | 0 |

|                        |                                                              |                    |   |
|------------------------|--------------------------------------------------------------|--------------------|---|
| AL162040               | NA                                                           | 0.149732620320856  | 0 |
| AK025352 <sup>2</sup>  | NA                                                           | 0.149458874458874  | 0 |
| BTNL8                  | butyrophilin like 8                                          | 0.149458874458874  | 0 |
| CAMK1G <sup>2,3</sup>  | calcium/calmodulin dependent protein kinase IG               | 0.149458874458874  | 0 |
| CDKL2                  | cyclin dependent kinase like 2                               | 0.149458874458874  | 0 |
| IFNA13 <sup>2</sup>    | interferon alpha 13                                          | 0.149458874458874  | 0 |
| FEZ1                   | fasciculation and elongation protein zeta 1                  | 0.148571428571429  | 0 |
| PARVA                  | parvin alpha                                                 | 0.148571428571429  | 0 |
| ATXN3L                 | ataxin 3 like                                                | 0.142857142857143  | 1 |
| CLEC1A                 | C-type lectin domain family 1 member A                       | 0.142857142857143  | 0 |
| DNAH3                  | dynein axonemal heavy chain 3                                | 0.142857142857143  | 1 |
| NXPE4                  | neurexophilin and PC-esterase domain family member 4         | 0.142857142857143  | 0 |
| PKNOX2                 | PBX/knotted 1 homeobox 2                                     | 0.142857142857143  | 0 |
| PRO2958                | NA                                                           | 0.142857142857143  | 0 |
| PTPRD                  | protein tyrosine phosphatase, receptor type D                | 0.142857142857143  | 0 |
| ROR1                   | receptor tyrosine kinase like orphan receptor 1              | 0.142857142857143  | 0 |
| SCAND2P <sup>2</sup>   | SCAN domain containing 2 pseudogene                          | 0.142857142857143  | 0 |
| CCL25 <sup>1,2,3</sup> | C-C motif chemokine ligand 25                                | 0.128030303030303  | 0 |
| TTY1B                  | testis-specific transcript, Y-linked 1B (non-protein coding) | 0.121428571428571  | 0 |
| BC000772 <sup>2</sup>  | NA                                                           | 0.120187165775401  | 0 |
| DLGAP1                 | DLG associated protein 1                                     | 0.111363636363636  | 0 |
| PYY2 <sup>2</sup>      | peptide YY, 2 (pseudogene)                                   | 0.111363636363636  | 0 |
| KRT12                  | keratin 12                                                   | 0.107575757575758  | 0 |
| C16orf72               | chromosome 16 open reading frame 72                          | 0.1                | 0 |
| PAK3                   | p21 (RAC1) activated kinase 3                                | 0.1                | 1 |
| ZNF442                 | zinc finger protein 442                                      | 0.0994588744588745 | 0 |
| AK025038               | NA                                                           | 0.0909090909090909 | 0 |
| AK025430               | NA                                                           | 0.0909090909090909 | 0 |
| C9orf38                | NA                                                           | 0.0909090909090909 | 0 |
| COL10A1                | collagen type X alpha 1 chain                                | 0.0909090909090909 | 0 |
| COL11A1                | collagen type XI alpha 1 chain                               | 0.0909090909090909 | 1 |
| COL1A1                 | collagen type I alpha 1                                      | 0.0909090909090909 | 0 |
| COL5A2                 | collagen type V alpha 2 chain                                | 0.0909090909090909 | 0 |
| D16471 <sup>3</sup>    | NA                                                           | 0.0909090909090909 | 0 |
| FAP                    | fibroblast activation protein alpha                          | 0.0909090909090909 | 0 |
| G6PC                   | glucose-6-phosphatase catalytic subunit                      | 0.0909090909090909 | 0 |
| GREM1                  | gremlin 1, DAN family BMP antagonist                         | 0.0909090909090909 | 0 |
| LRRC15                 | leucine rich repeat containing 15                            | 0.0909090909090909 | 0 |
| MTMR7                  | myotubularin related protein 7                               | 0.0909090909090909 | 0 |
| MXRA5                  | matrix remodeling associated 5                               | 0.0909090909090909 | 0 |
| PPP1R3A                | protein phosphatase 1 regulatory subunit 3A                  | 0.0909090909090909 | 1 |
| SPP1 <sup>3</sup>      | secreted phosphoprotein 1                                    | 0.0909090909090909 | 0 |
| SULF1 <sup>3</sup>     | sulfatase 1                                                  | 0.0909090909090909 | 0 |

|                         |                                                        |                    |   |
|-------------------------|--------------------------------------------------------|--------------------|---|
| TEX41                   | testis expressed 41 (non-protein coding)               | 0.0909090909090909 | 0 |
| THBS2                   | thrombospondin 2                                       | 0.0909090909090909 | 0 |
| BMP8B <sup>1,2,3</sup>  | bone morphogenetic protein 8b                          | 0.0868538324420677 | 0 |
| C1orf105 <sup>1,3</sup> | chromosome 1 open reading frame 105                    | 0.0868538324420677 | 0 |
| CSRP3                   | cysteine and glycine rich protein 3                    | 0.0868538324420677 | 0 |
| CPN2                    | carboxypeptidase N subunit 2                           | 0.0827922077922078 | 0 |
| GLRA2                   | glycine receptor alpha 2                               | 0.0827922077922078 | 0 |
| AAK1 <sup>2,3</sup>     | AP2 associated kinase 1                                | 0.078030303030303  | 0 |
| KCNA2                   | potassium voltage-gated channel subfamily A member 2   | 0.078030303030303  | 0 |
| TCL6 <sup>1,2,3</sup>   | T-cell leukemia/lymphoma 6 (non-protein coding)        | 0.078030303030303  | 0 |
| LOC51145                | NA                                                     | 0.0754901960784314 | 0 |
| CLDN18                  | claudin 18                                             | 0.0714739229024943 | 0 |
| ERG <sup>1,4</sup>      | ERG, ETS transcription factor                          | 0.0714739229024943 | 0 |
| FGFR4 <sup>4</sup>      | fibroblast growth factor receptor 4                    | 0.0714739229024943 | 0 |
| FOXF1 <sup>1,4</sup>    | forkhead box F1                                        | 0.0714739229024943 | 0 |
| GPM6A <sup>1,4</sup>    | glycoprotein M6A                                       | 0.0714739229024943 | 0 |
| GRK5 <sup>1</sup>       | G protein-coupled receptor kinase 5                    | 0.0714739229024943 | 0 |
| KCNK3 <sup>1</sup>      | potassium two pore domain channel subfamily K member 3 | 0.0714739229024943 | 0 |
| LRRN3 <sup>1,4</sup>    | leucine rich repeat neuronal 3                         | 0.0714739229024943 | 0 |
| SASH1 <sup>1,4</sup>    | SAM and SH3 domain containing 1                        | 0.0714739229024943 | 0 |
| SLIT2 <sup>1,4</sup>    | slit guidance ligand 2                                 | 0.0714739229024943 | 0 |
| TEK <sup>1,3,4</sup>    | TEK receptor tyrosine kinase                           | 0.0714739229024943 | 0 |
| TGFBR3 <sup>1,4</sup>   | transforming growth factor beta receptor 3             | 0.0714739229024943 | 0 |
| CASR                    | calcium sensing receptor                               | 0.0714285714285714 | 0 |
| CST8                    | cystatin 8                                             | 0.0714285714285714 | 0 |
| CTNNA3                  | catenin alpha 3                                        | 0.0714285714285714 | 0 |
| CCKBR                   | cholecystokinin B receptor                             | 0.0701871657754011 | 0 |
| GRM1 <sup>2,3</sup>     | glutamate metabotropic receptor 1                      | 0.0701871657754011 | 0 |
