# Supplementary material for: An application of the Shapley value to the analysis of co-expression networks
Source: Springer Nature journal article supplement (doi:10.1007/s41109-018-0095-y), 2018-08-24
Supplement: MOESM3 [file 16072620]

## S3 Table

| Gene symbol               | Gene name                                              | $\rho$           | $k$ |
|---------------------------|--------------------------------------------------------|------------------|-----|
| ATP2B2 <sup>1,2,3</sup>   | ATPase plasma membrane Ca <sup>2+</sup> transporting 2 | 18.4968930265747 | 8   |
| C1orf105 <sup>1,3</sup>   | chromosome 1 open reading frame 105                    | 13.7288298097441 | 8   |
| PRB1 <sup>1,2,3</sup>     | proline rich protein BstNI subfamily 1                 | 13.3347102121442 | 3   |
| CCL25 <sup>1,2,3</sup>    | C-C motif chemokine ligand 25                          | 12.9864672408187 | 10  |
| CDHR5 <sup>1,3</sup>      | cadherin related family member 5                       | 12.4145709883877 | 3   |
| PDIA2 <sup>3</sup>        | protein disulfide isomerase family A member 2          | 11.6061057741986 | 5   |
| GYPA <sup>1,2,3</sup>     | glycophorin A (MNS blood group)                        | 11.5052460543739 | 8   |
| HOXC8 <sup>1,2,3</sup>    | homeobox C8                                            | 10.8814446249438 | 4   |
| TCL6 <sup>1,2,3</sup>     | T-cell leukemia/lymphoma 6 (non-protein coding)        | 10.8729995724874 | 3   |
| TSPY1 <sup>1,2,3</sup>    | testis specific protein, Y-linked 1                    | 10.4394568980079 | 3   |
| HRG <sup>1,2,3</sup>      | histidine rich glycoprotein                            | 10.0102747292022 | 10  |
| MLXIPL <sup>3</sup>       | MLX interacting protein like                           | 9.83327153093983 | 9   |
| EDA <sup>1,2,3</sup>      | ectodysplasin A                                        | 9.64847640412969 | 3   |
| SEZ6L <sup>1,2,3</sup>    | seizure related 6 homolog like                         | 9.47867509832141 | 3   |
| OR1A1                     | olfactory receptor family 1 subfamily A member 1       | 9.33046614911308 | 7   |
| AK024615 <sup>1,2,3</sup> | NA                                                     | 9.22821633760145 | 8   |
| PRB4 <sup>1,2,3</sup>     | proline rich protein BstNI subfamily 4                 | 9.11861977475885 | 3   |
| ZNF335 <sup>3</sup>       | zinc finger protein 335                                | 9.09897657855088 | 4   |
| KCNA2                     | potassium voltage-gated channel subfamily A member 2   | 8.86054243002737 | 7   |
| ZNF771 <sup>1,2,3</sup>   | zinc finger protein 771                                | 8.81703058371348 | 3   |
| AK025072 <sup>3</sup>     | NA                                                     | 8.72320592268589 | 7   |
| LOC100506002              | NA                                                     | 8.61427535284604 | 11  |
| AF119878                  | NA                                                     | 8.56221670492298 | 7   |
| BMP8B <sup>1,2,3</sup>    | bone morphogenetic protein 8b                          | 8.51405007440748 | 8   |
| NODAL <sup>3</sup>        | nodal growth differentiation factor                    | 8.4558549181182  | 7   |
| ELAVL3 <sup>3</sup>       | ELAV like neuron-specific RNA binding protein 3        | 8.44550175908849 | 7   |
| EMX1 <sup>1,2,3</sup>     | empty spiracles homeobox 1                             | 8.4242643003209  | 3   |
| DSCAM <sup>2</sup>        | DS cell adhesion molecule                              | 8.16553943246246 | 10  |
| HMX1 <sup>3</sup>         | H6 family homeobox 1                                   | 8.15525277481443 | 5   |
| KCNJ1                     | potassium voltage-gated channel subfamily J member 1   | 8.13025327936225 | 8   |
| CAMK1G <sup>2,3</sup>     | calcium/calmodulin dependent protein kinase IG         | 7.78314620880678 | 6   |
| LTB4R2                    | leukotriene B4 receptor 2                              | 7.71255655866246 | 10  |
| BTNL8                     | butyrophilin like 8                                    | 7.64311215670017 | 8   |
| HAPLN2 <sup>2,3</sup>     | hyaluronan and proteoglycan link protein 2             | 7.63529888053862 | 3   |
| FUT7 <sup>3</sup>         | fucosyltransferase 7                                   | 7.50677480941965 | 7   |

|                         |                                                            |                  |    |
|-------------------------|------------------------------------------------------------|------------------|----|
| ADAM5                   | ADAM metalloproteinase domain 5 (pseudogene)               | 7.42666528314341 | 8  |
| IFNA13 <sup>2</sup>     | interferon alpha 13                                        | 7.40319722519809 | 7  |
| CDKL2                   | cyclin dependent kinase like 2                             | 7.31993815928898 | 7  |
| MAP3K19 <sup>2,3</sup>  | mitogen-activated protein kinase kinase kinase 19          | 7.23211910217063 | 4  |
| PAX8 <sup>1,2,3</sup>   | paired box 8                                               | 7.11851211195136 | 3  |
| CA14                    | carbonic anhydrase 14                                      | 7.10052407649743 | 7  |
| MYL1                    | myosin light chain 1                                       | 7.09947777830419 | 8  |
| EPO                     | erythropoietin                                             | 7.09189491213324 | 6  |
| KCNB2 <sup>1,2,3</sup>  | potassium voltage-gated channel subfamily B member 2       | 7.07536136721792 | 3  |
| FOXL1 <sup>2,3</sup>    | forkhead box L1                                            | 6.95024136477208 | 4  |
| AAK1 <sup>2,3</sup>     | AP2 associated kinase 1                                    | 6.91822837078907 | 7  |
| BC000772 <sup>2</sup>   | NA                                                         | 6.88184604860484 | 7  |
| GNAT1                   | G protein subunit alpha transducin 1                       | 6.81948519912769 | 10 |
| ZNF442                  | zinc finger protein 442                                    | 6.81754467719459 | 8  |
| FEV <sup>2</sup>        | FEV, ETS transcription factor                              | 6.79739185238554 | 7  |
| LDB2 <sup>1,3,4</sup>   | LIM domain binding 2                                       | 6.78913784624733 | 1  |
| DUX4L2                  | double homeobox 4 like 2                                   | 6.74419555996507 | 6  |
| ARVCF <sup>3</sup>      | armadillo repeat gene deleted in velocardiofacial syndrome | 6.73928464890796 | 8  |
| GRM1 <sup>2,3</sup>     | glutamate metabotropic receptor 1                          | 6.68057522752628 | 5  |
| LOC51145                | NA                                                         | 6.65805138335087 | 7  |
| FLJ11292 <sup>2,3</sup> | NA                                                         | 6.57372359719334 | 4  |
| WT1-AS <sup>2</sup>     | WT1 antisense RNA                                          | 6.53248118174916 | 7  |
| TEK <sup>1,3,4</sup>    | TEK receptor tyrosine kinase                               | 6.46678086791464 | 1  |
| CA1 <sup>3</sup>        | carbonic anhydrase 1                                       | 6.44871559296281 | 7  |
| CCDC70 <sup>2</sup>     | coiled-coil domain containing 70                           | 6.41209424073279 | 7  |
| GPR135 <sup>2,3</sup>   | G protein-coupled receptor 135                             | 6.35701222209935 | 6  |
| GP1BB                   | glycoprotein Ib platelet beta subunit                      | 6.29699941893655 | 6  |
| GPR144                  | adhesion G protein-coupled receptor D2                     | 6.28198739685931 | 6  |
| AW975117                | NA                                                         | 6.15144694479165 | 7  |
| SCN10A <sup>2</sup>     | sodium voltage-gated channel alpha subunit 10              | 6.12969729143662 | 7  |
| GPR52                   | G protein-coupled receptor 52                              | 6.12025864336093 | 7  |
| DOHH                    | deoxyhypusine hydroxylase/monooxygenase                    | 6.07302532724421 | 6  |
| ATP2B3 <sup>2,3</sup>   | ATPase plasma membrane Ca <sup>2+</sup> transporting 3     | 6.04233529409678 | 4  |
| WNT10B <sup>2,3</sup>   | Wnt family member 10B                                      | 5.98285094528619 | 3  |
| CD1B                    | CD1b molecule                                              | 5.93382563986049 | 7  |
| TCF21 <sup>1,3,4</sup>  | transcription factor 21                                    | 5.91568960918555 | 1  |
| SLC17A4                 | solute carrier family 17 member 4                          | 5.89244118922335 | 8  |
| NR6A1 <sup>1</sup>      | nuclear receptor subfamily 6 group A member 1              | 5.88146534927107 | 5  |
| AF023203                | NA                                                         | 5.86486783569472 | 5  |
| GML                     | glycosylphosphatidylinositol anchored molecule like        | 5.85409440585522 | 7  |

|                           |                                                                     |                  |    |
|---------------------------|---------------------------------------------------------------------|------------------|----|
| KCNS1 <sup>2</sup>        | potassium voltage-gated channel modifier sub-family S member 1      | 5.84452694533979 | 8  |
| LLGL1 <sup>2,3</sup>      | LLGL1, scribble cell polarity complex component                     | 5.8323488700226  | 3  |
| CENPO                     | centromere protein O                                                | 5.82700828006012 | 4  |
| EDNRB <sup>1</sup>        | endothelin receptor type B                                          | 5.79607391080148 | 1  |
| CSRP3                     | cysteine and glycine rich protein 3                                 | 5.7044271478122  | 7  |
| CLEC3B <sup>1,3,4</sup>   | C-type lectin domain family 3 member B                              | 5.64384144092779 | 1  |
| MARCO <sup>3</sup>        | macrophage receptor with collagenous structure                      | 5.61624750262895 | 4  |
| AK025352 <sup>2</sup>     | NA                                                                  | 5.61050911390812 | 4  |
| JAM2 <sup>1,4</sup>       | junctional adhesion molecule 2                                      | 5.5894640710116  | 1  |
| BMP15                     | bone morphogenetic protein 15                                       | 5.58487772585608 | 7  |
| NPR1 <sup>3</sup>         | natriuretic peptide receptor 1                                      | 5.58067578760658 | 5  |
| AK024553                  | NA                                                                  | 5.56052450889608 | 7  |
| FHL1 <sup>1,4</sup>       | four and a half LIM domains 1                                       | 5.53317512915856 | 1  |
| SASH1 <sup>1,4</sup>      | SAM and SH3 domain containing 1                                     | 5.51964156610769 | 2  |
| AOC3 <sup>1,3,4</sup>     | amine oxidase, copper containing 3                                  | 5.51219671063685 | 1  |
| CYP11B2 <sup>3</sup>      | cytochrome P450 family 11 subfamily B member 2                      | 5.49779257564747 | 6  |
| TNFRSF13B                 | TNF receptor superfamily member 13B                                 | 5.48285549331722 | 9  |
| AK025422 <sup>1,2,3</sup> | NA                                                                  | 5.46235640137296 | 4  |
| SLC14A2 <sup>2</sup>      | solute carrier family 14 member 2                                   | 5.45679545178622 | 3  |
| RUNX2 <sup>2</sup>        | runt related transcription factor 2                                 | 5.43705868607741 | 3  |
| DLX2 <sup>2,3</sup>       | distal-less homeobox 2                                              | 5.42927250433307 | 3  |
| FNDC8 <sup>2,3</sup>      | fibronectin type III domain containing 8                            | 5.42575479256574 | 5  |
| FIGF <sup>1,4</sup>       | vascular endothelial growth factor D                                | 5.38818797984467 | 1  |
| PART1                     | prostate androgen-regulated transcript 1 (non-protein coding)       | 5.35987464820128 | 6  |
| SLC12A5                   | solute carrier family 12 member 5                                   | 5.28505220194836 | 10 |
| CCRN4L <sup>2,3</sup>     | nocturnin                                                           | 5.26296832657673 | 4  |
| HTR3B <sup>2,3</sup>      | 5-hydroxytryptamine receptor 3B                                     | 5.23677967416225 | 4  |
| VSIG4 <sup>3</sup>        | V-set and immunoglobulin domain containing 4                        | 5.22895709127482 | 3  |
| ASB4                      | ankyrin repeat and SOCS box containing 4                            | 5.22440764676332 | 4  |
| SLC22A11 <sup>2,3</sup>   | solute carrier family 22 member 11                                  | 5.19817921281046 | 3  |
| SERPINB10 <sup>2</sup>    | serpin family B member 10                                           | 5.15717776478373 | 2  |
| OR1D2 <sup>2</sup>        | olfactory receptor family 1 subfamily D member 2                    | 5.14529200069891 | 4  |
| OR10C1                    | olfactory receptor family 10 subfamily C member 1 (gene/pseudogene) | 5.13923156921155 | 5  |
